# Supplementary material for: Genes Associated with the Flax Plant Type (Oil or Fiber) Identified Based on Genome and Transcriptome Sequencing Data
Source: MDPI journal article supplement (doi:10.3390/plants10122616), 2021-11-28

**Supplementary Figure S4b.** Dendrogram of linseed and fiber flax varieties based on polymorphisms of *PAL3* gene.

**Supplementary Figure S4c.** Dendrogram of linseed and fiber flax varieties based on polymorphisms of *4CL1* gene.

Supplementary Figure S4d. Dendrogram of linseed and fiber flax varieties based on polymorphisms of *C4H4* gene.

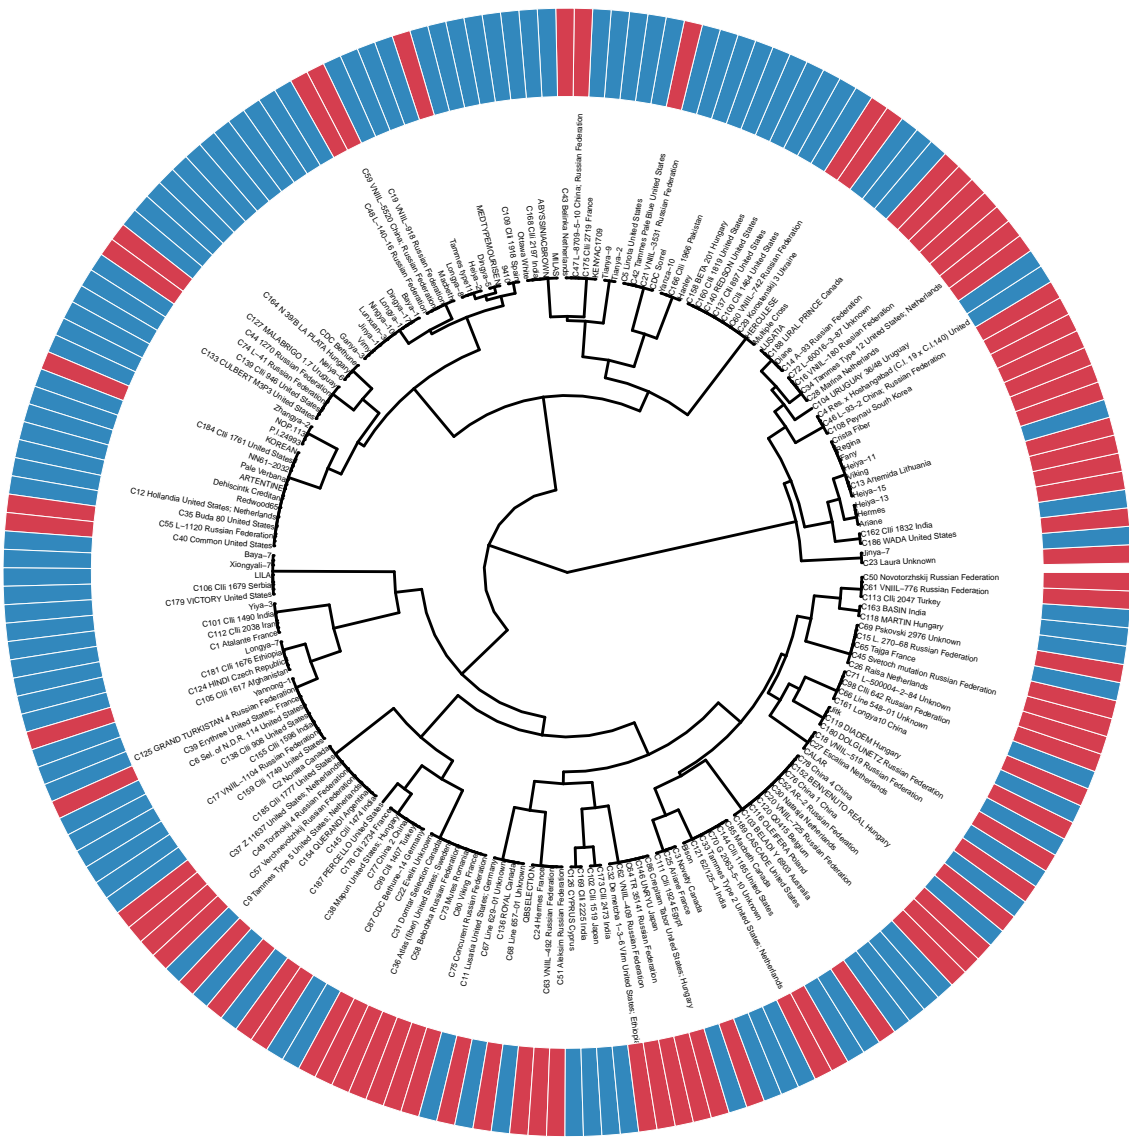

**Supplementary Figure S4e.** Dendrogram of linseed and fiber flax varieties based on polymorphisms of *CAD1B* gene.

**Supplementary Figure S4f.** Dendrogram of linseed and fiber flax varieties based on polymorphisms of *CESA1-B* gene.



**Supplementary Figure S4g.** Dendrogram of linseed and fiber flax varieties based on polymorphisms of *CTL1* gene.





**Supplementary Figure S4i.** Dendrogram of linseed and fiber flax varieties based on polymorphisms of *Beta\_TUB3* gene.

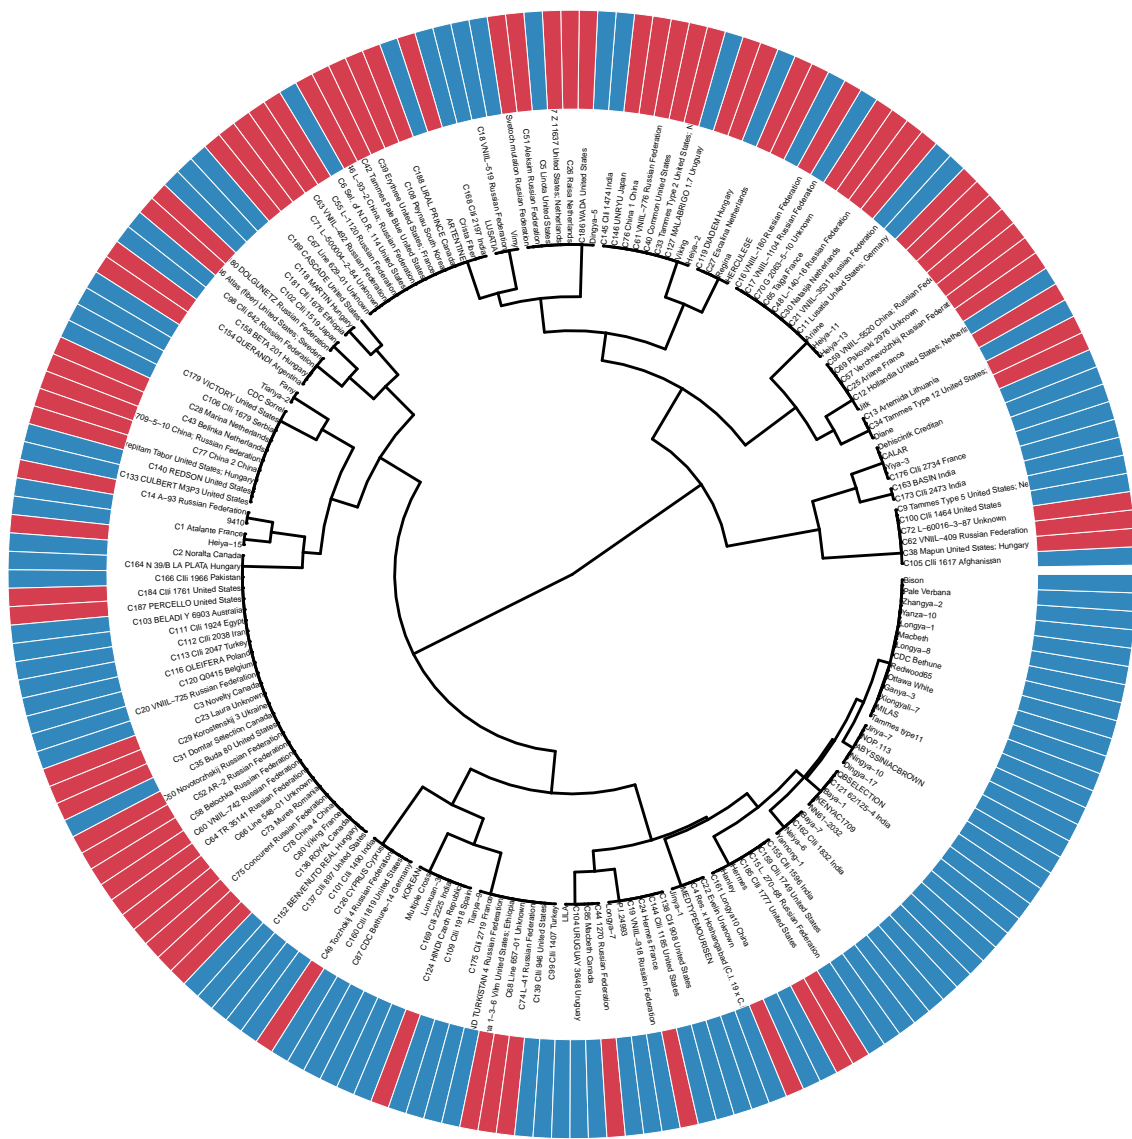

**Supplementary Figure S4j.** Dendrogram of linseed and fiber flax varieties based on polymorphisms of *BGAL40* gene.

**Supplementary Figure S4k.** Dendrogram of linseed and fiber flax varieties based on polymorphisms of *BGAL30* gene.

**Supplementary Figure S4l.** Dendrogram of linseed and fiber flax varieties based on polymorphisms of *PLR1* gene.

**Supplementary Figure S4m.** Dendrogram of linseed and fiber flax varieties based on polymorphisms of *FAD2A* gene.

**Supplementary Figure S4n.** Dendrogram of linseed and fiber flax varieties based on polymorphisms of *ABCA1* gene.



**Supplementary Figure S40.** Dendrogram of linseed and fiber flax varieties based on polymorphisms of *ABCA7* gene.

**Supplementary Figure S4p.** Dendrogram of linseed and fiber flax varieties based on polymorphisms of *ABCB42* gene.

**Supplementary Figure S4q.** Dendrogram of linseed and fiber flax varieties based on polymorphisms of *ABCB47* gene.

**Supplementary Figure S4r.** Dendrogram of linseed and fiber flax varieties based on polymorphisms of *ABCG71* gene.

**Supplementary Figure S4s.** Dendrogram of linseed and fiber flax varieties based on polymorphisms of *ABCG80* gene.

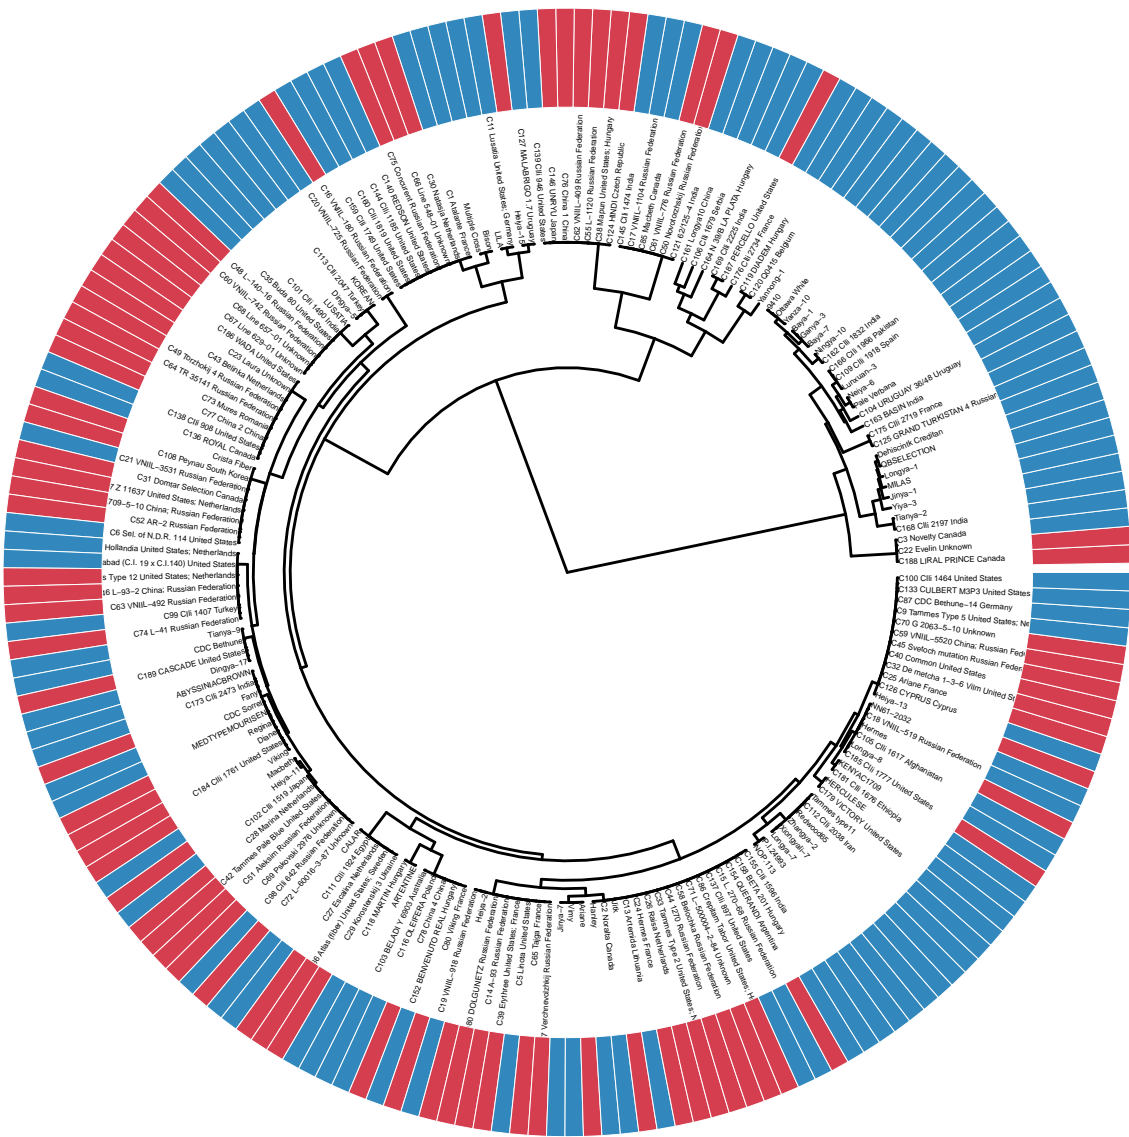

Supplement: s1 [file s1]
