# Supplementary material for: Genes Associated with the Flax Plant Type (Oil or Fiber) Identified Based on Genome and Transcriptome Sequencing Data
Source: MDPI journal article supplement (doi:10.3390/plants10122616), 2021-11-28
Supplement: s1 [file s1]

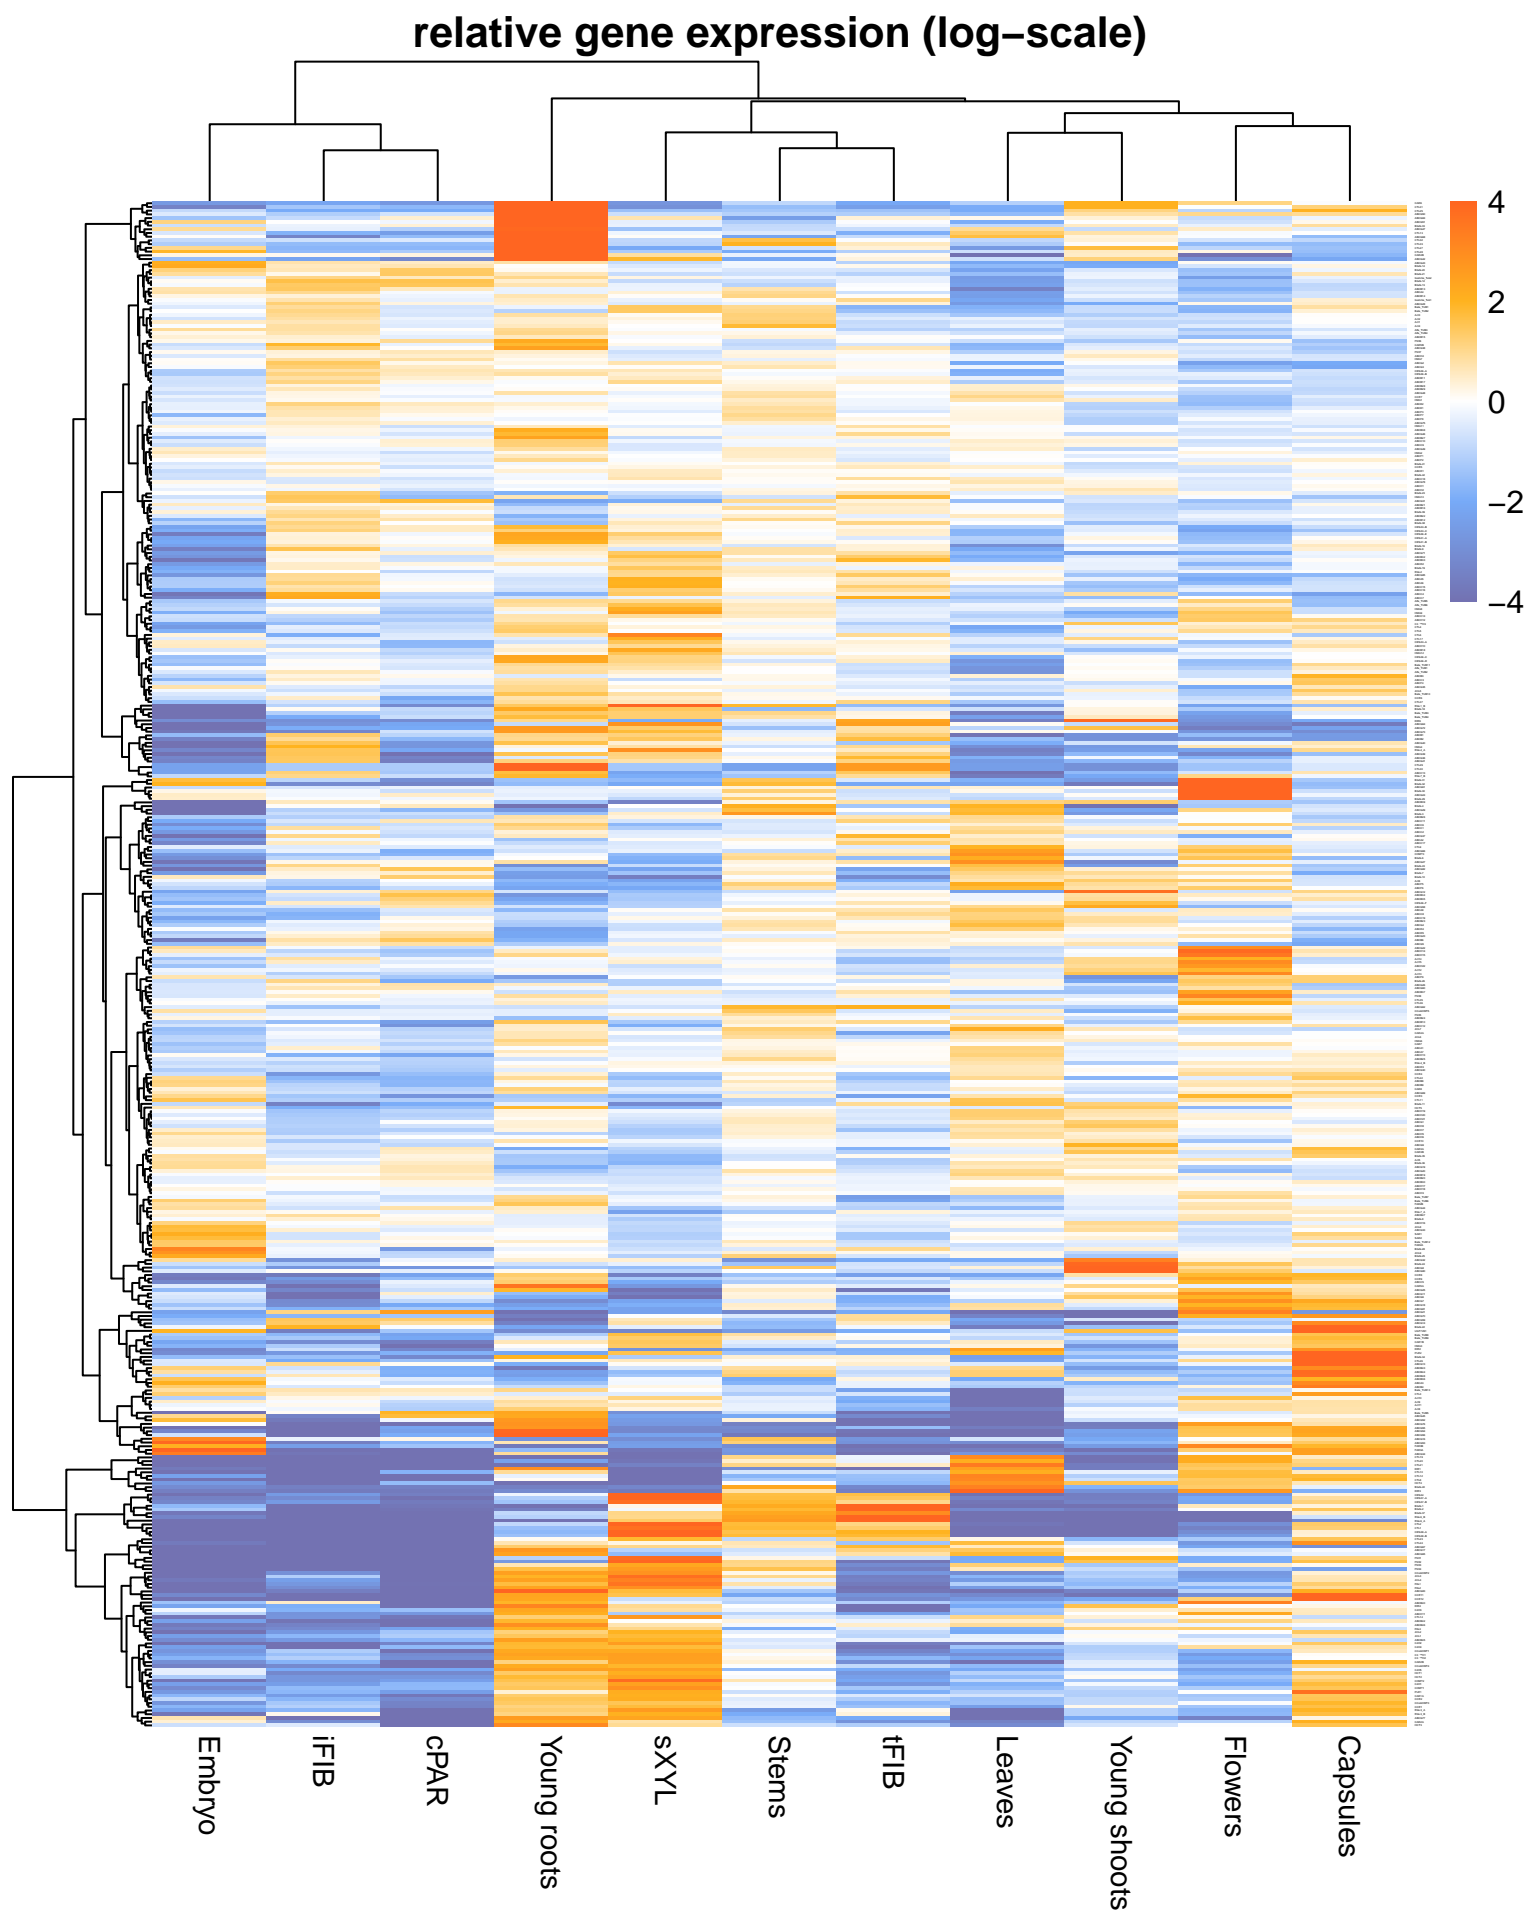

**Supplementary Figure S2.** Heatmap of expression levels of genes of *4CL*, *C3'H*, *C4H*, *CAD*, *CCR*, *CCoAOMT*, *COMT*, *F5H*, *HCT*, *PAL*, *CTL*, *BGAL*, *ABC*, *HMA*, *DIR*, *PLR*, *UGT*, *TUB*, *CESA*, *RGL*, *FAD*, *SAD*, and *ACT* families in different flax tissues (averaged by tissue type).
