# Supplementary material for: Genes Associated with the Flax Plant Type (Oil or Fiber) Identified Based on Genome and Transcriptome Sequencing Data
Source: MDPI journal article supplement (doi:10.3390/plants10122616), 2021-11-28
Supplement: s1 [file s1]

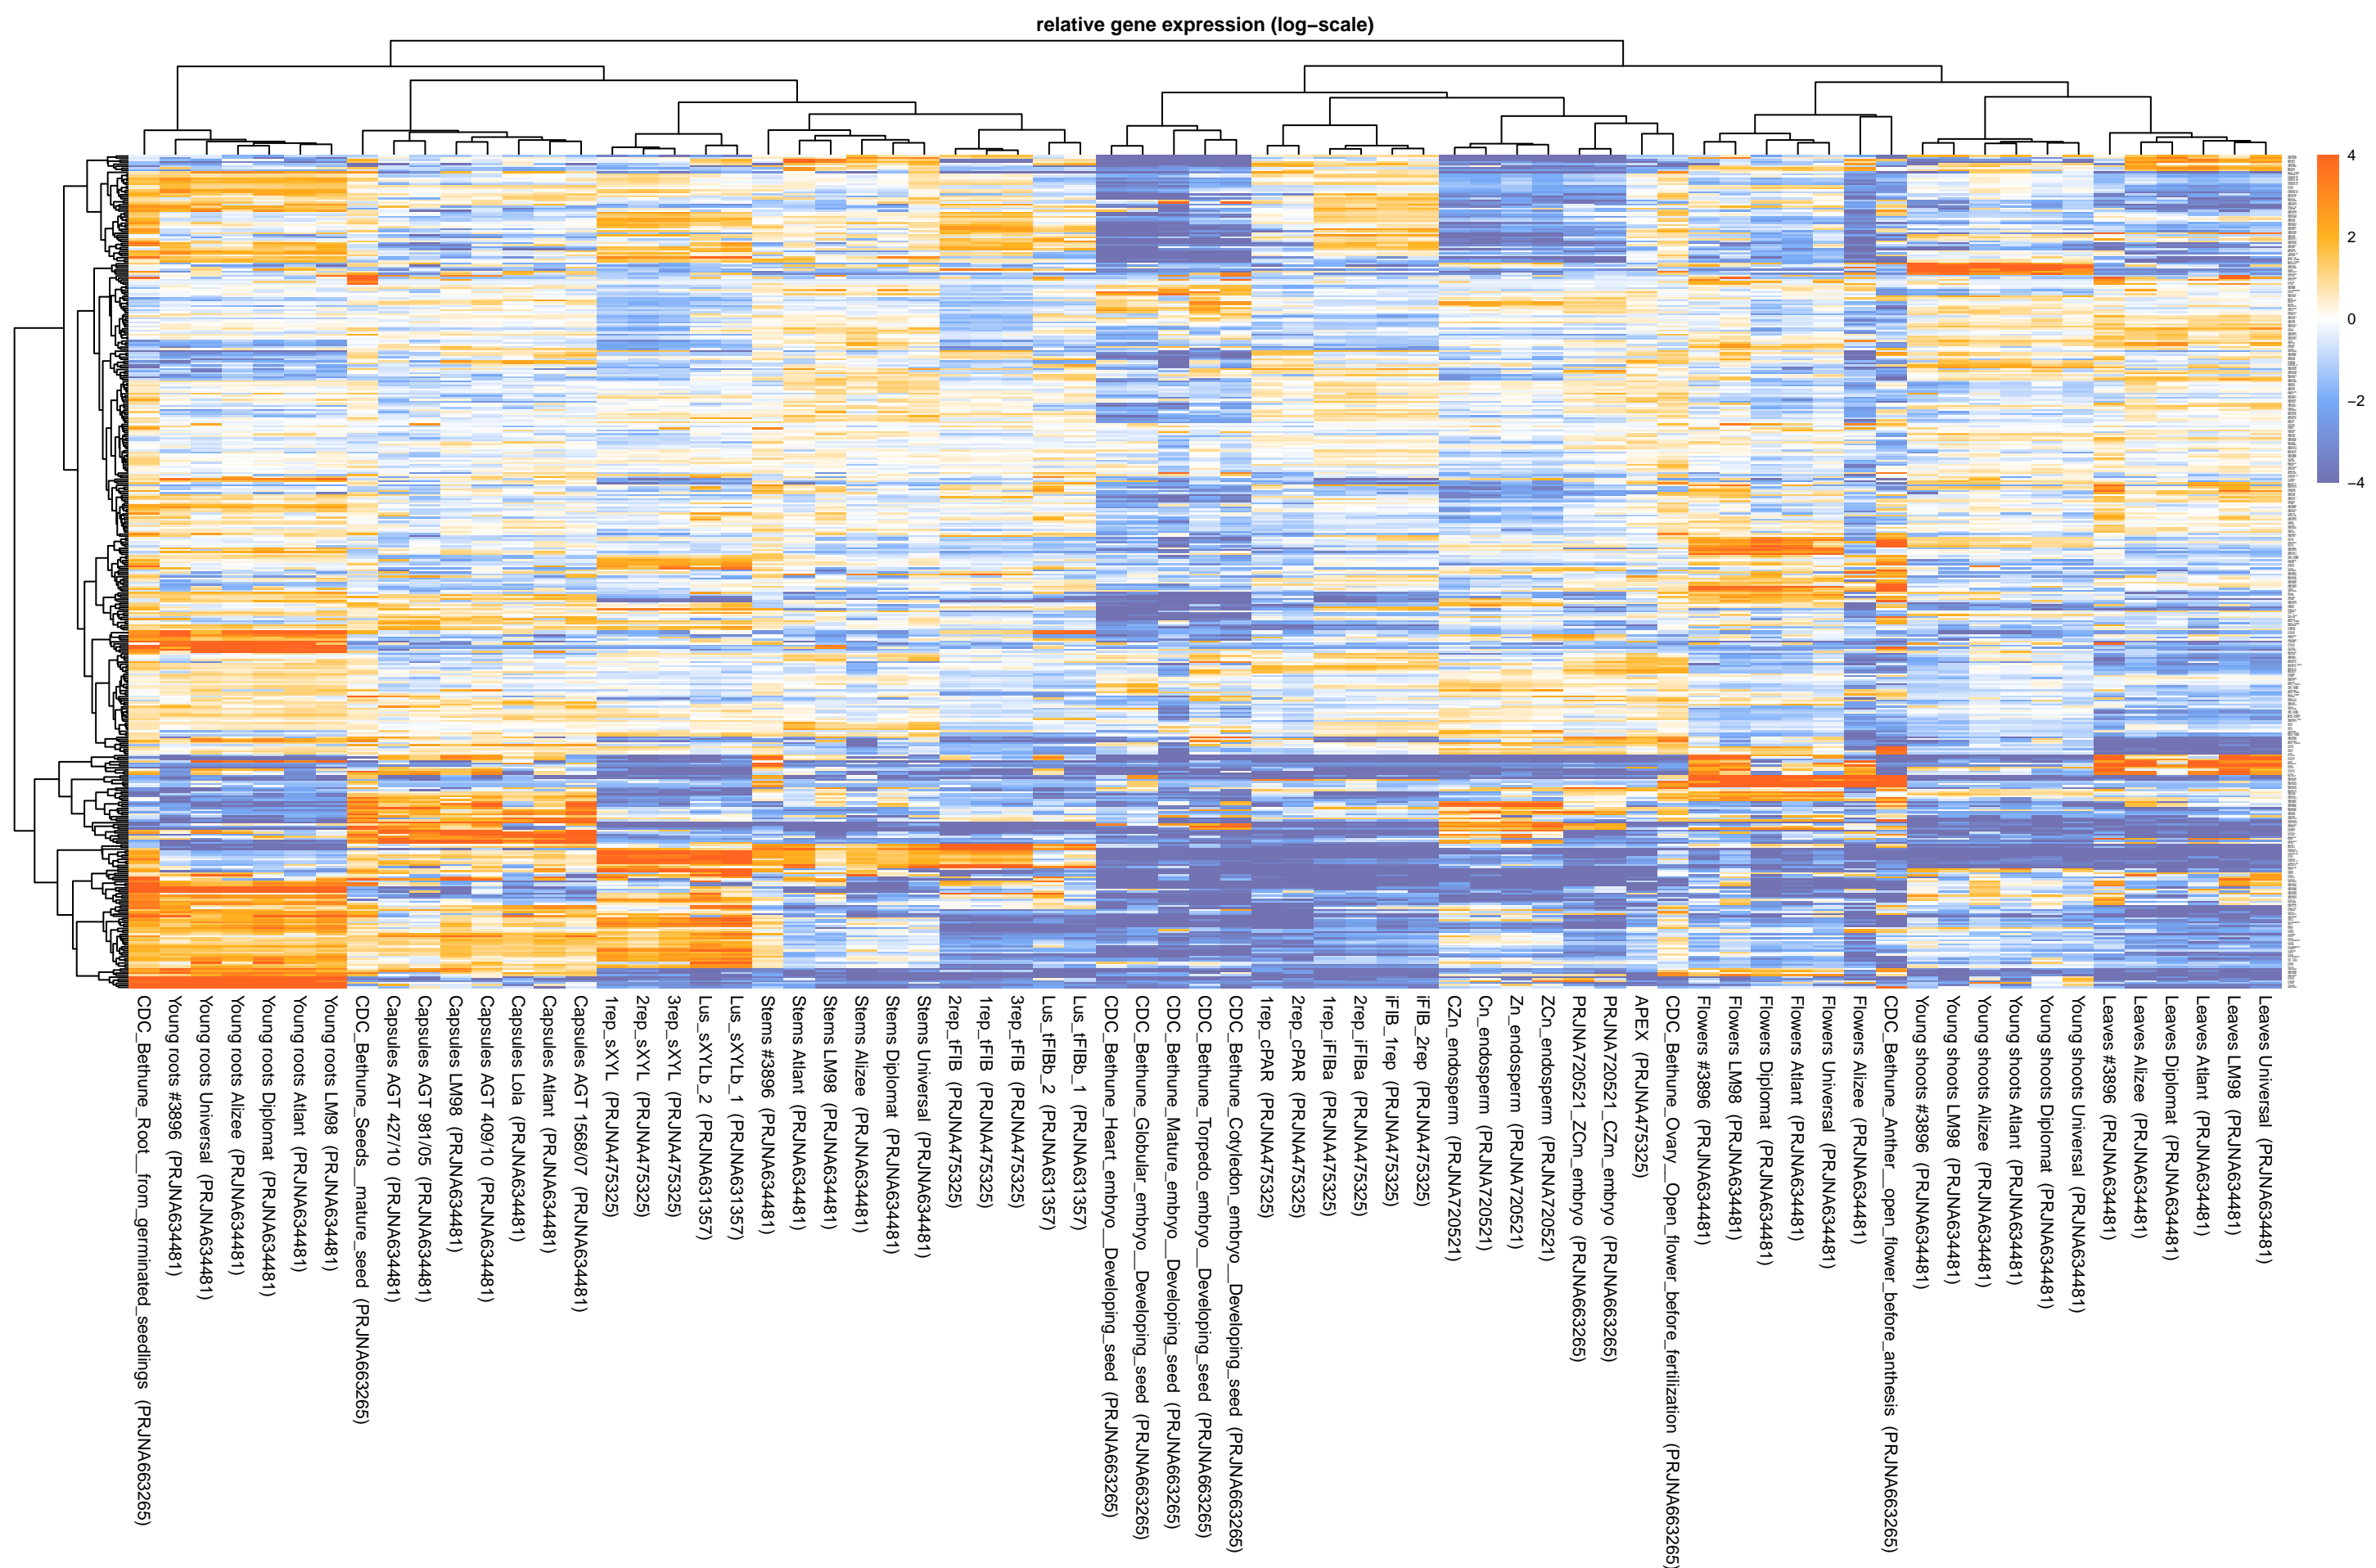

**Supplementary Figure S3.** Heatmap of expression levels of genes of 4CL, C3'H, C4H, CAD, CCR, CCoAOMT, COMT, F5H, HCT, PAL, CTL, BGAL, ABC, HMA, DIR, PLR, UGT, TUB, CESA, RGL, FAD, SAD, and ACT families in different flax tissues (individual samples).
